# Supplementary material for: Evolutionary and Phenotypic Characterization of Two Spike Mutations in European Lineage 20E of SARS-CoV-2
Source: PubMed Central journal article supplement (PMC8593680; doi:10.1128/mbio.02315-21), 2021-11-16

c

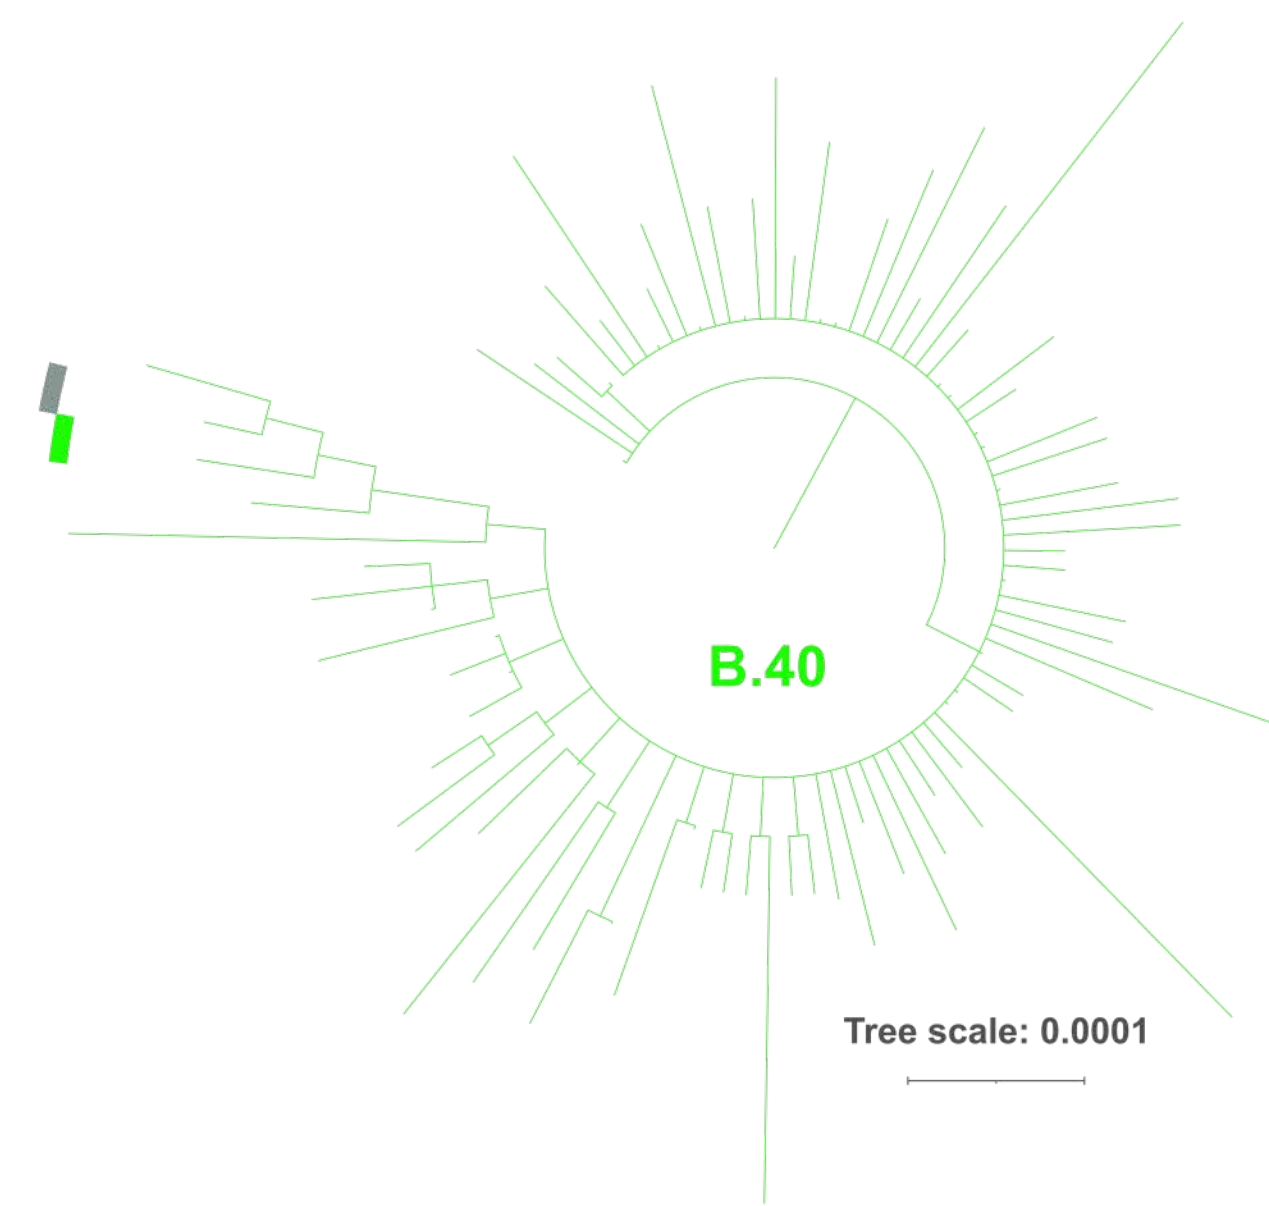

d

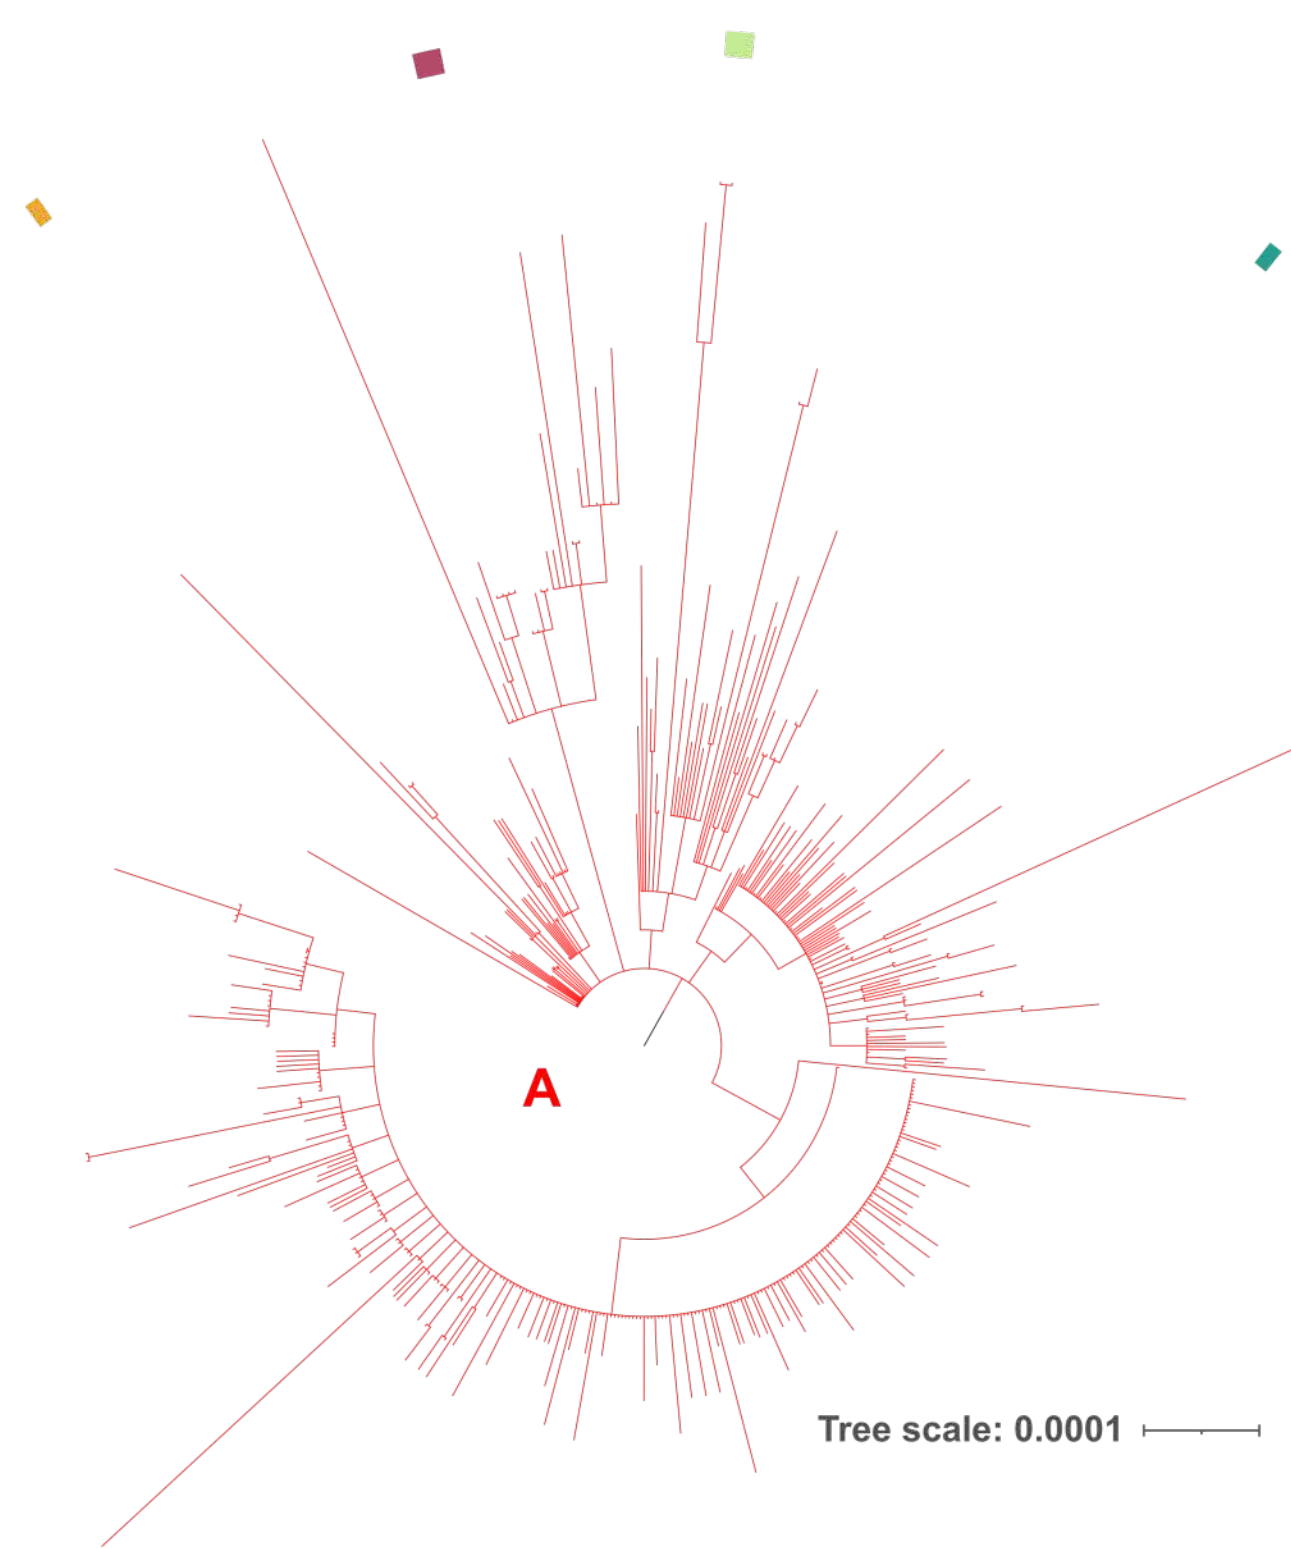

b

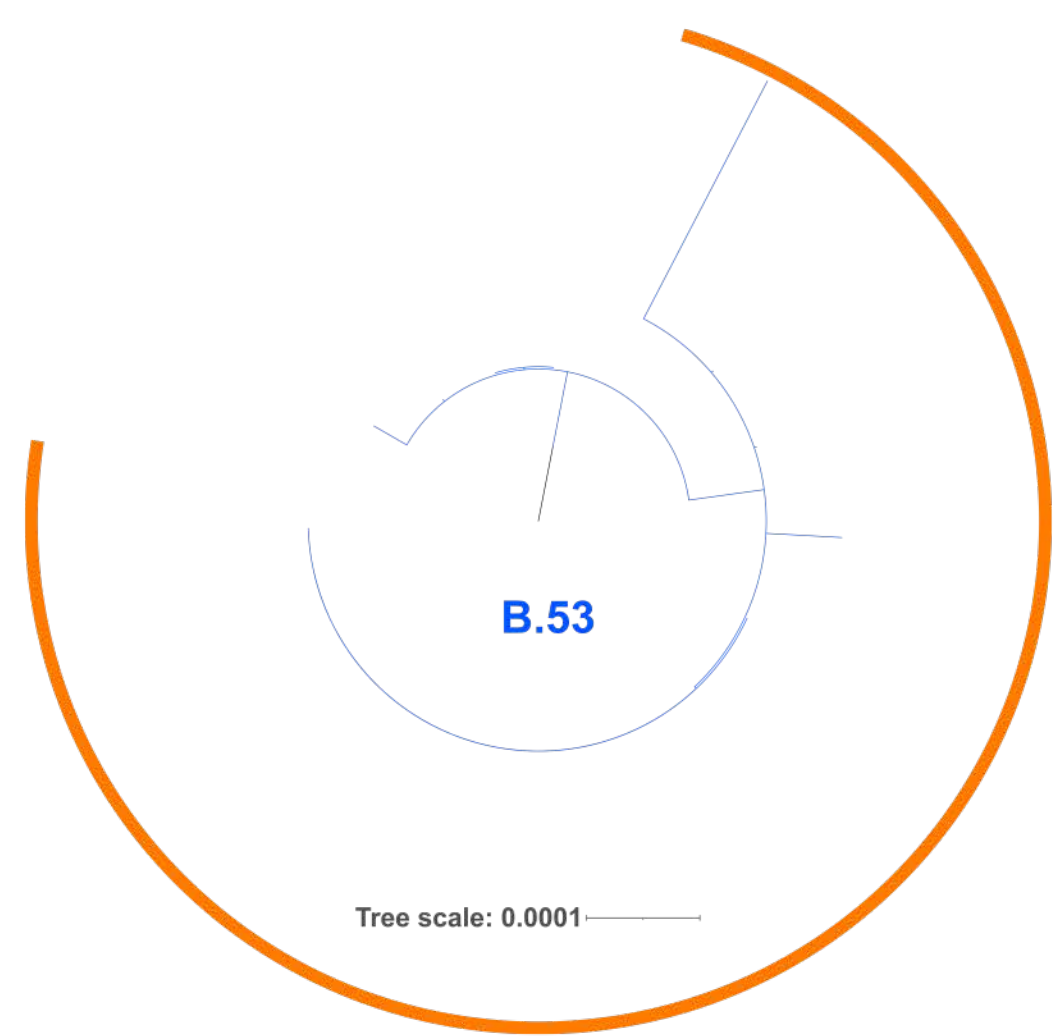

a

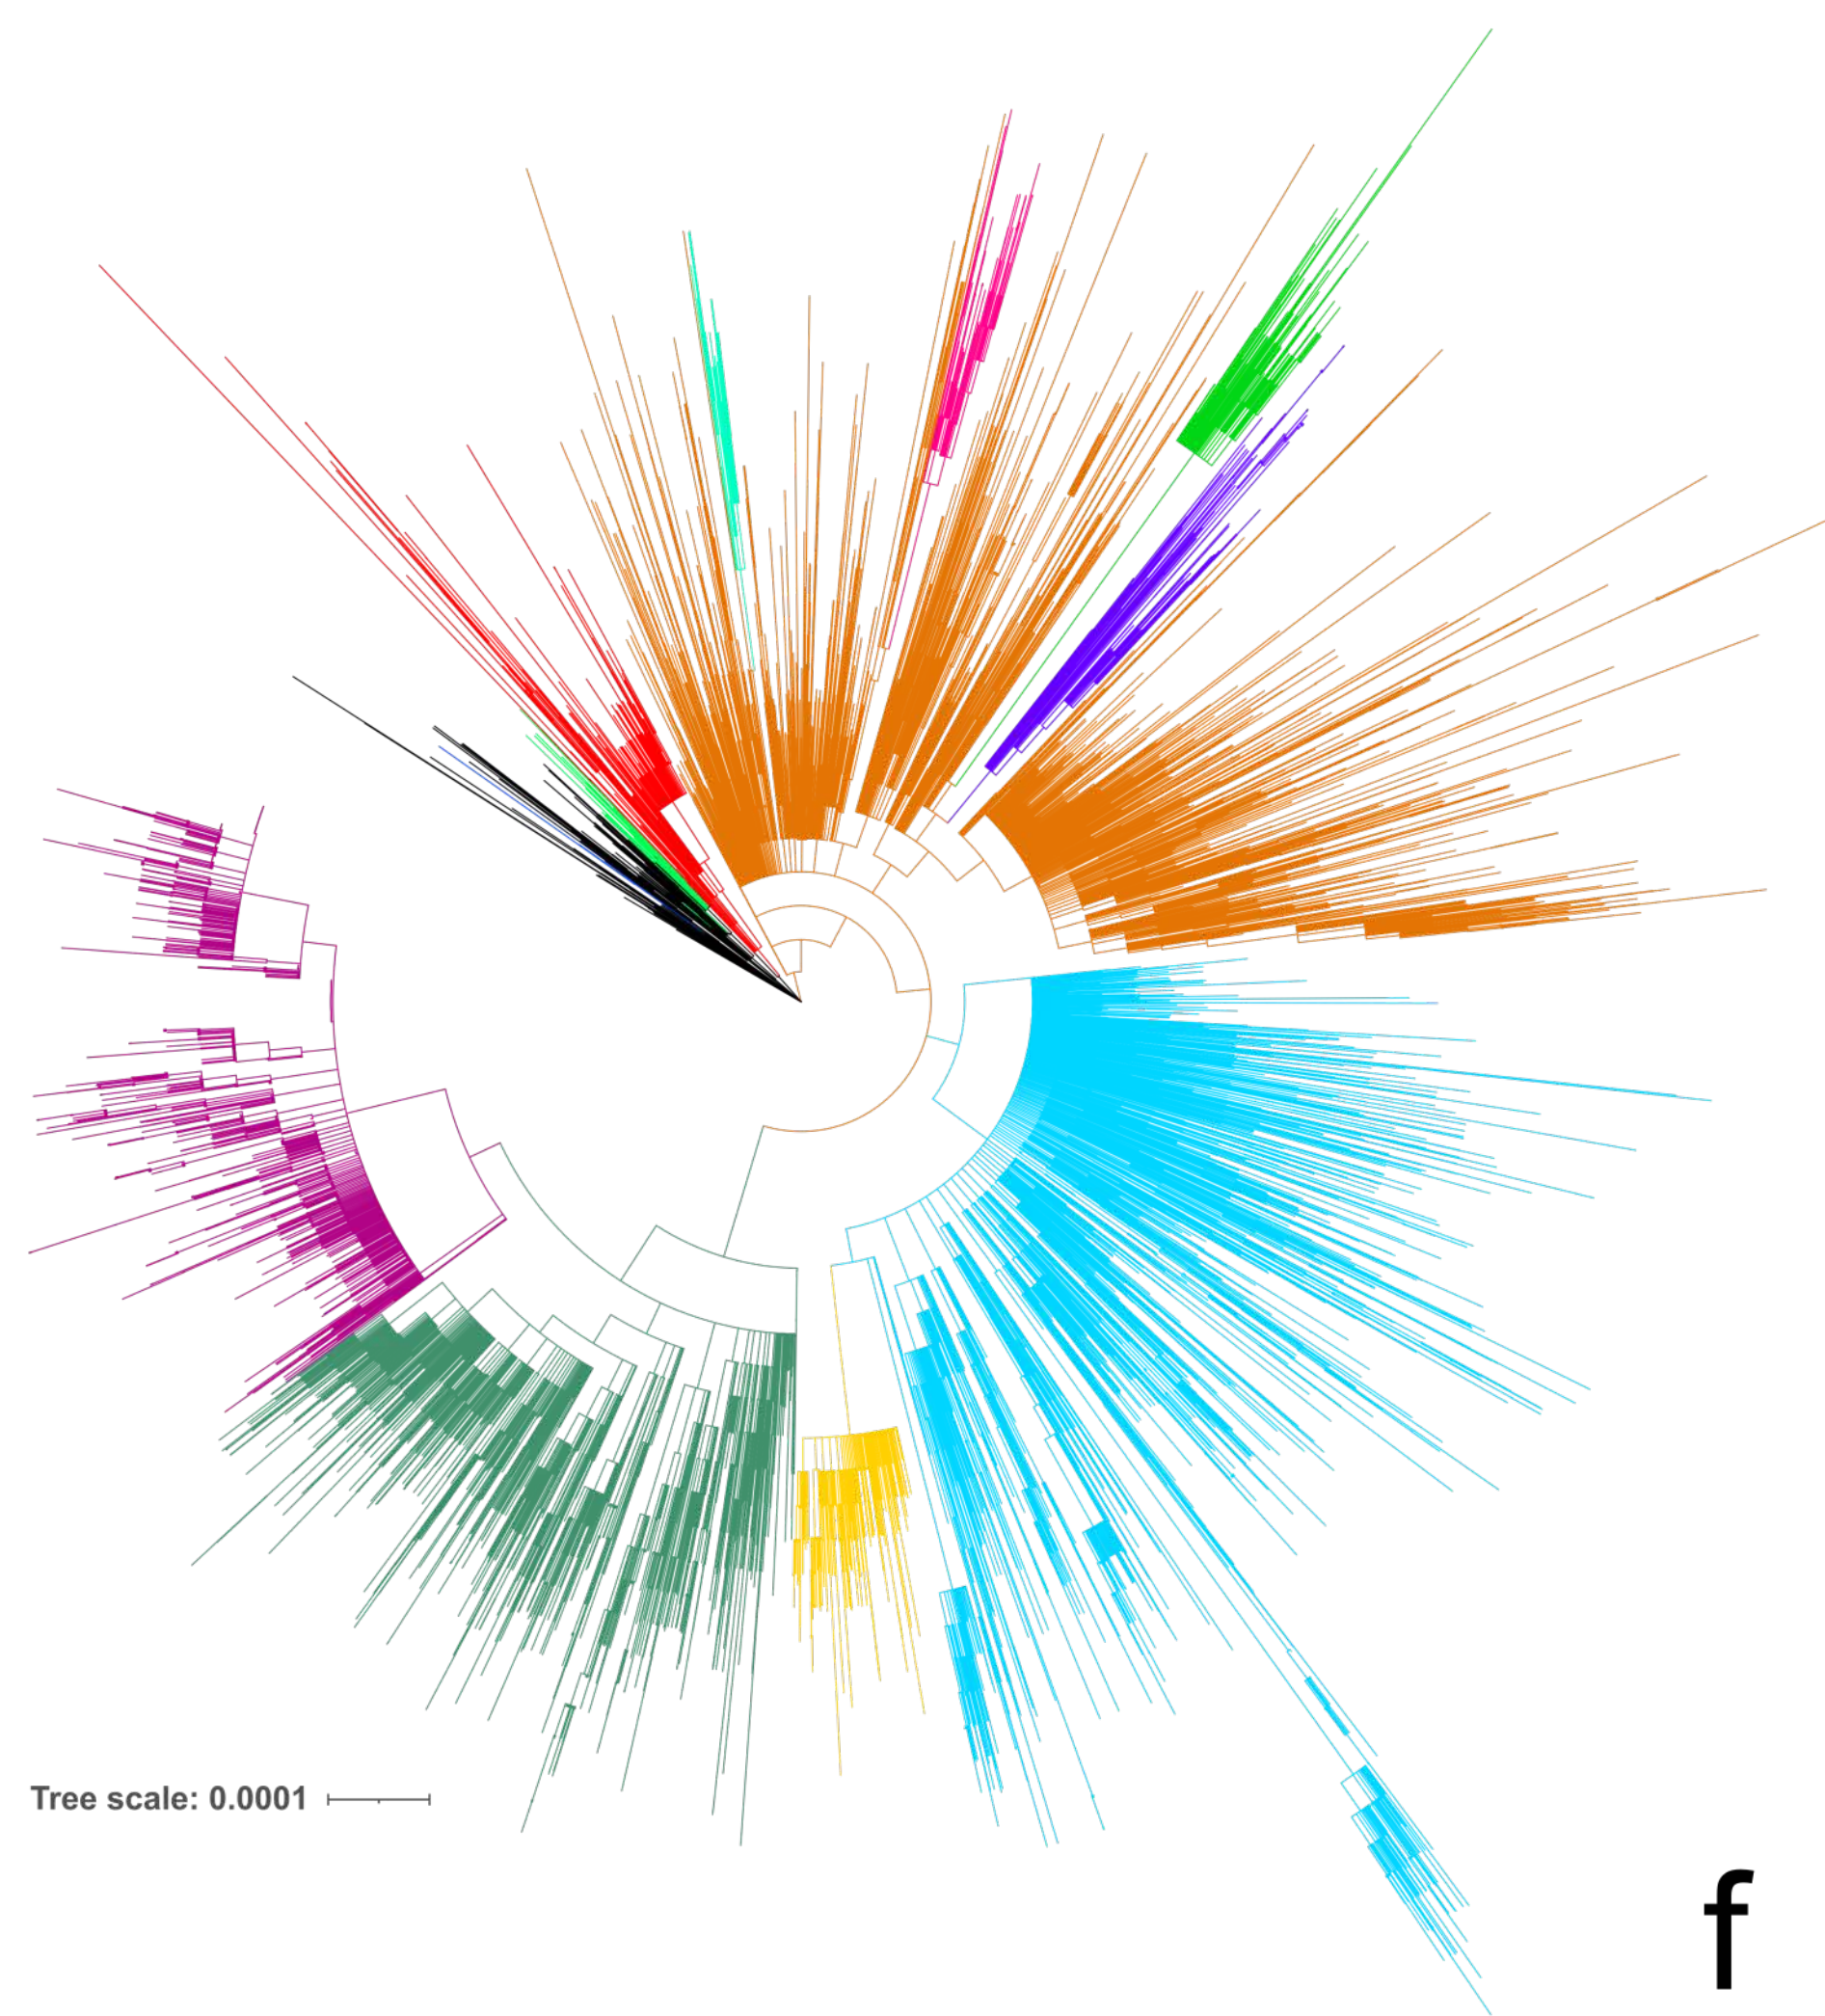

e

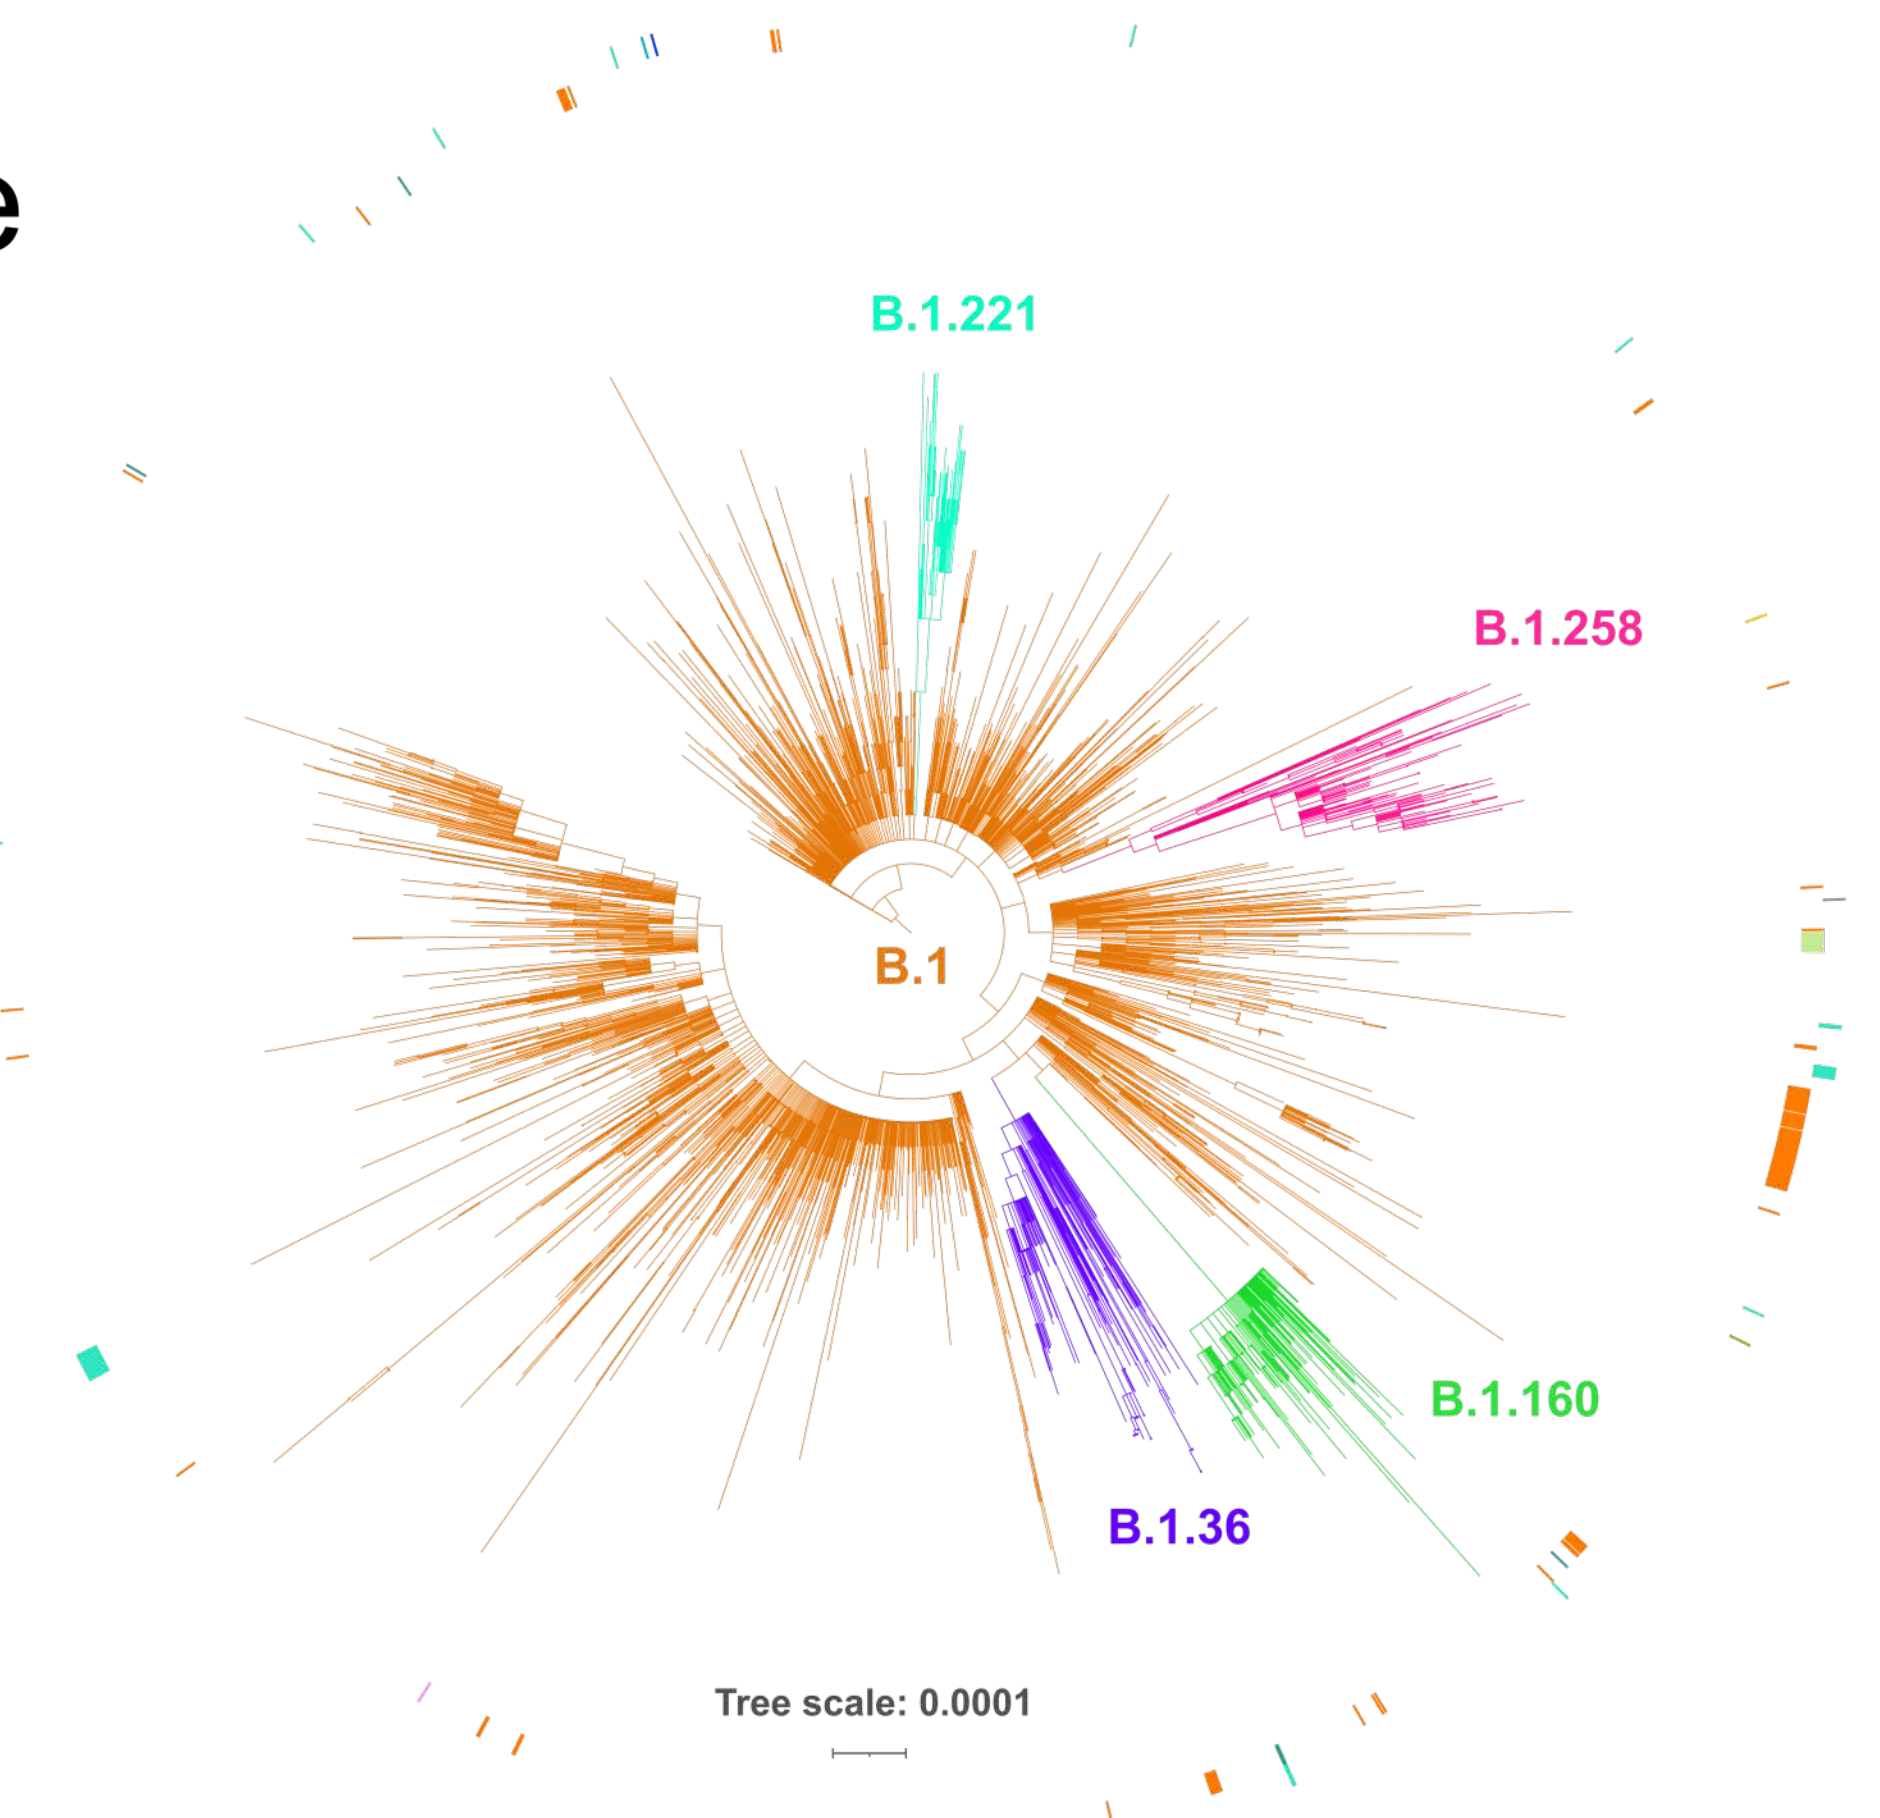

g

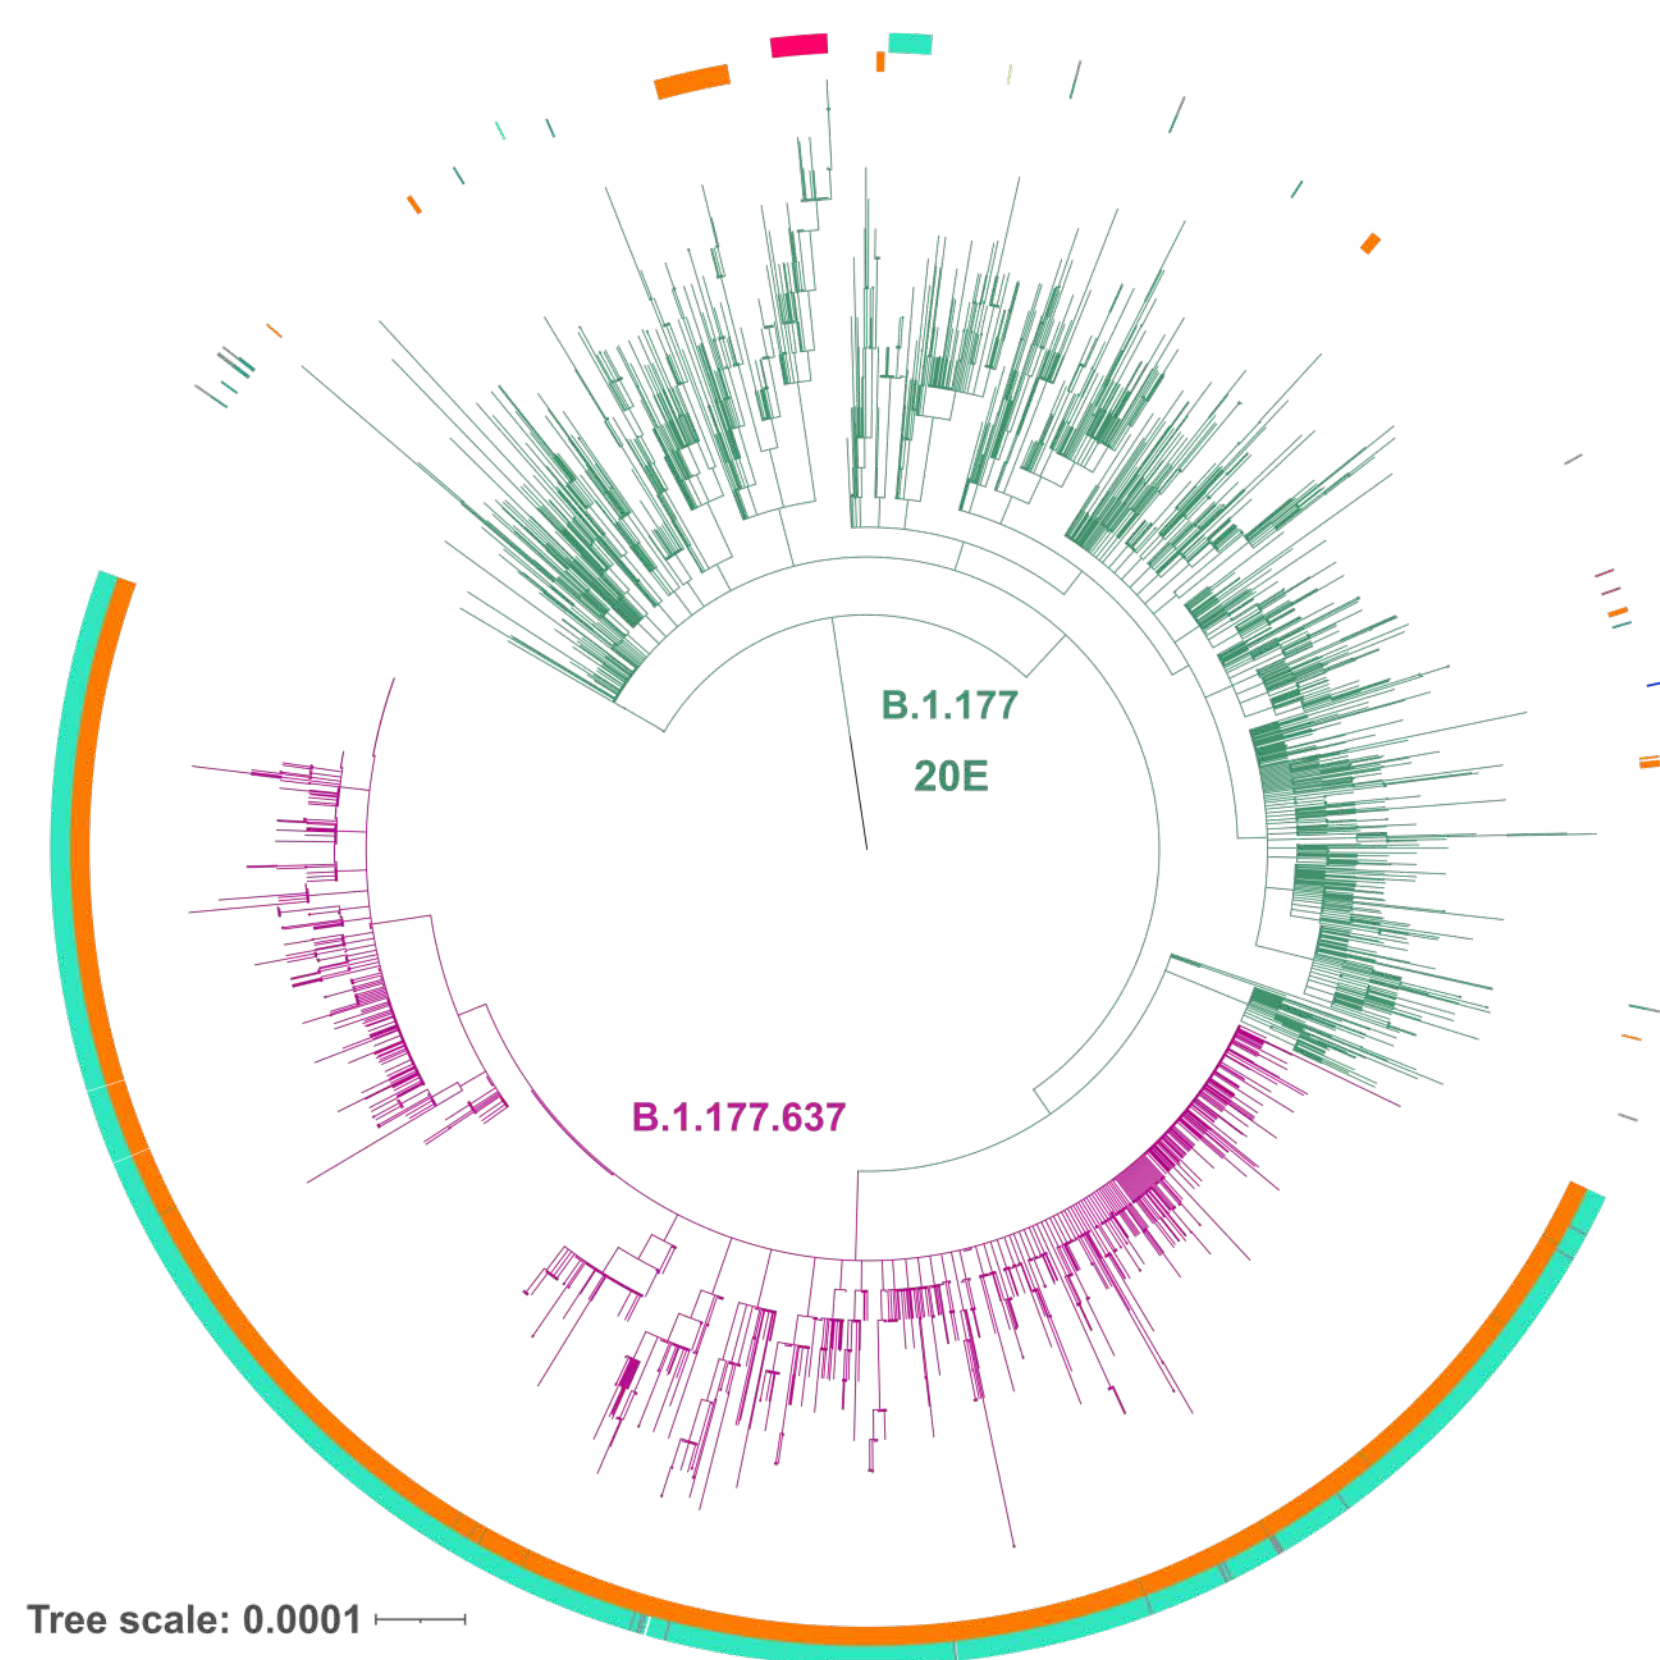

| Position D1163 | Position G1167 |
|----------------|----------------|
| 1163A          | 1167A          |
| 1163E/D        | 1167C/G        |
| 1163G          | 1167D          |
| 1163H          | 1167F          |
| 1163Y/D        | 1167R          |
| 1163H/Y/D      | 1167R/G        |
| 1163N/D        | 1167S          |
| 1163V          | 1167S/G        |
| 1163Y          | 1167V          |
|                | 1167V/G        |

f

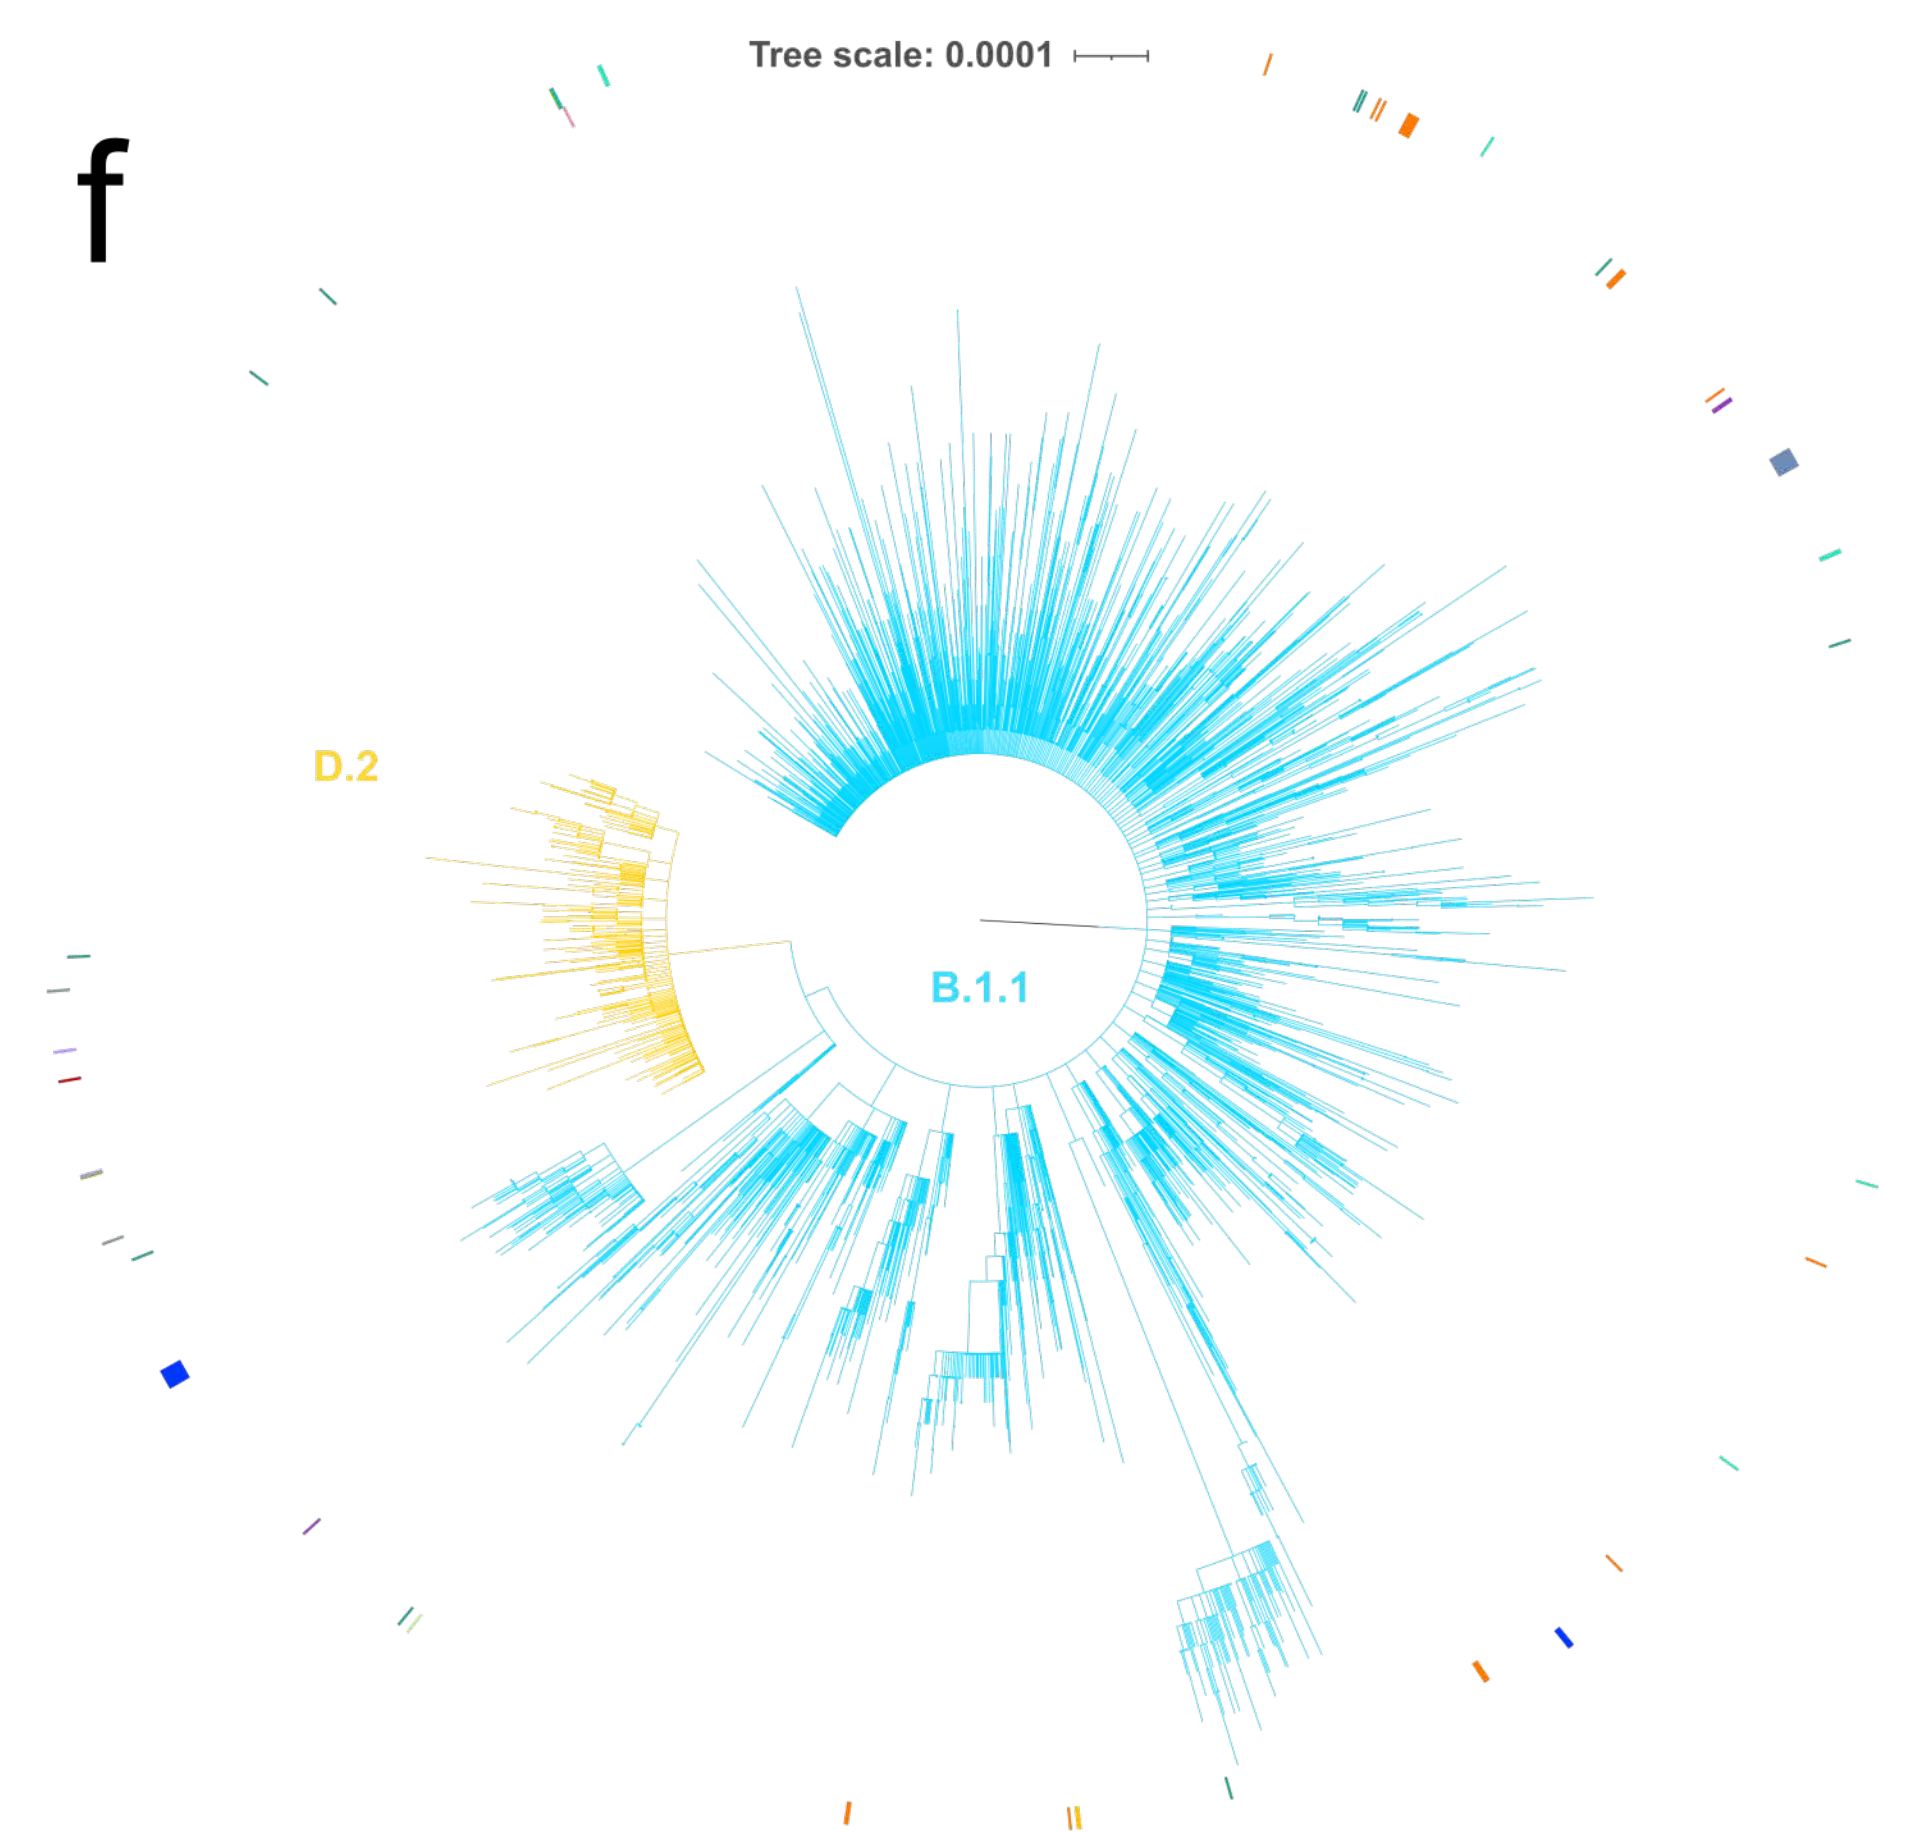

Supplement: mbio.02315-21-sf002.pdf [file mbio.02315-21-sf002.pdf]
