# Supplementary material for: Evolutionary and Phenotypic Characterization of Two Spike Mutations in European Lineage 20E of SARS-CoV-2
Source: PubMed Central journal article supplement (PMC8593680; doi:10.1128/mbio.02315-21), 2021-11-16

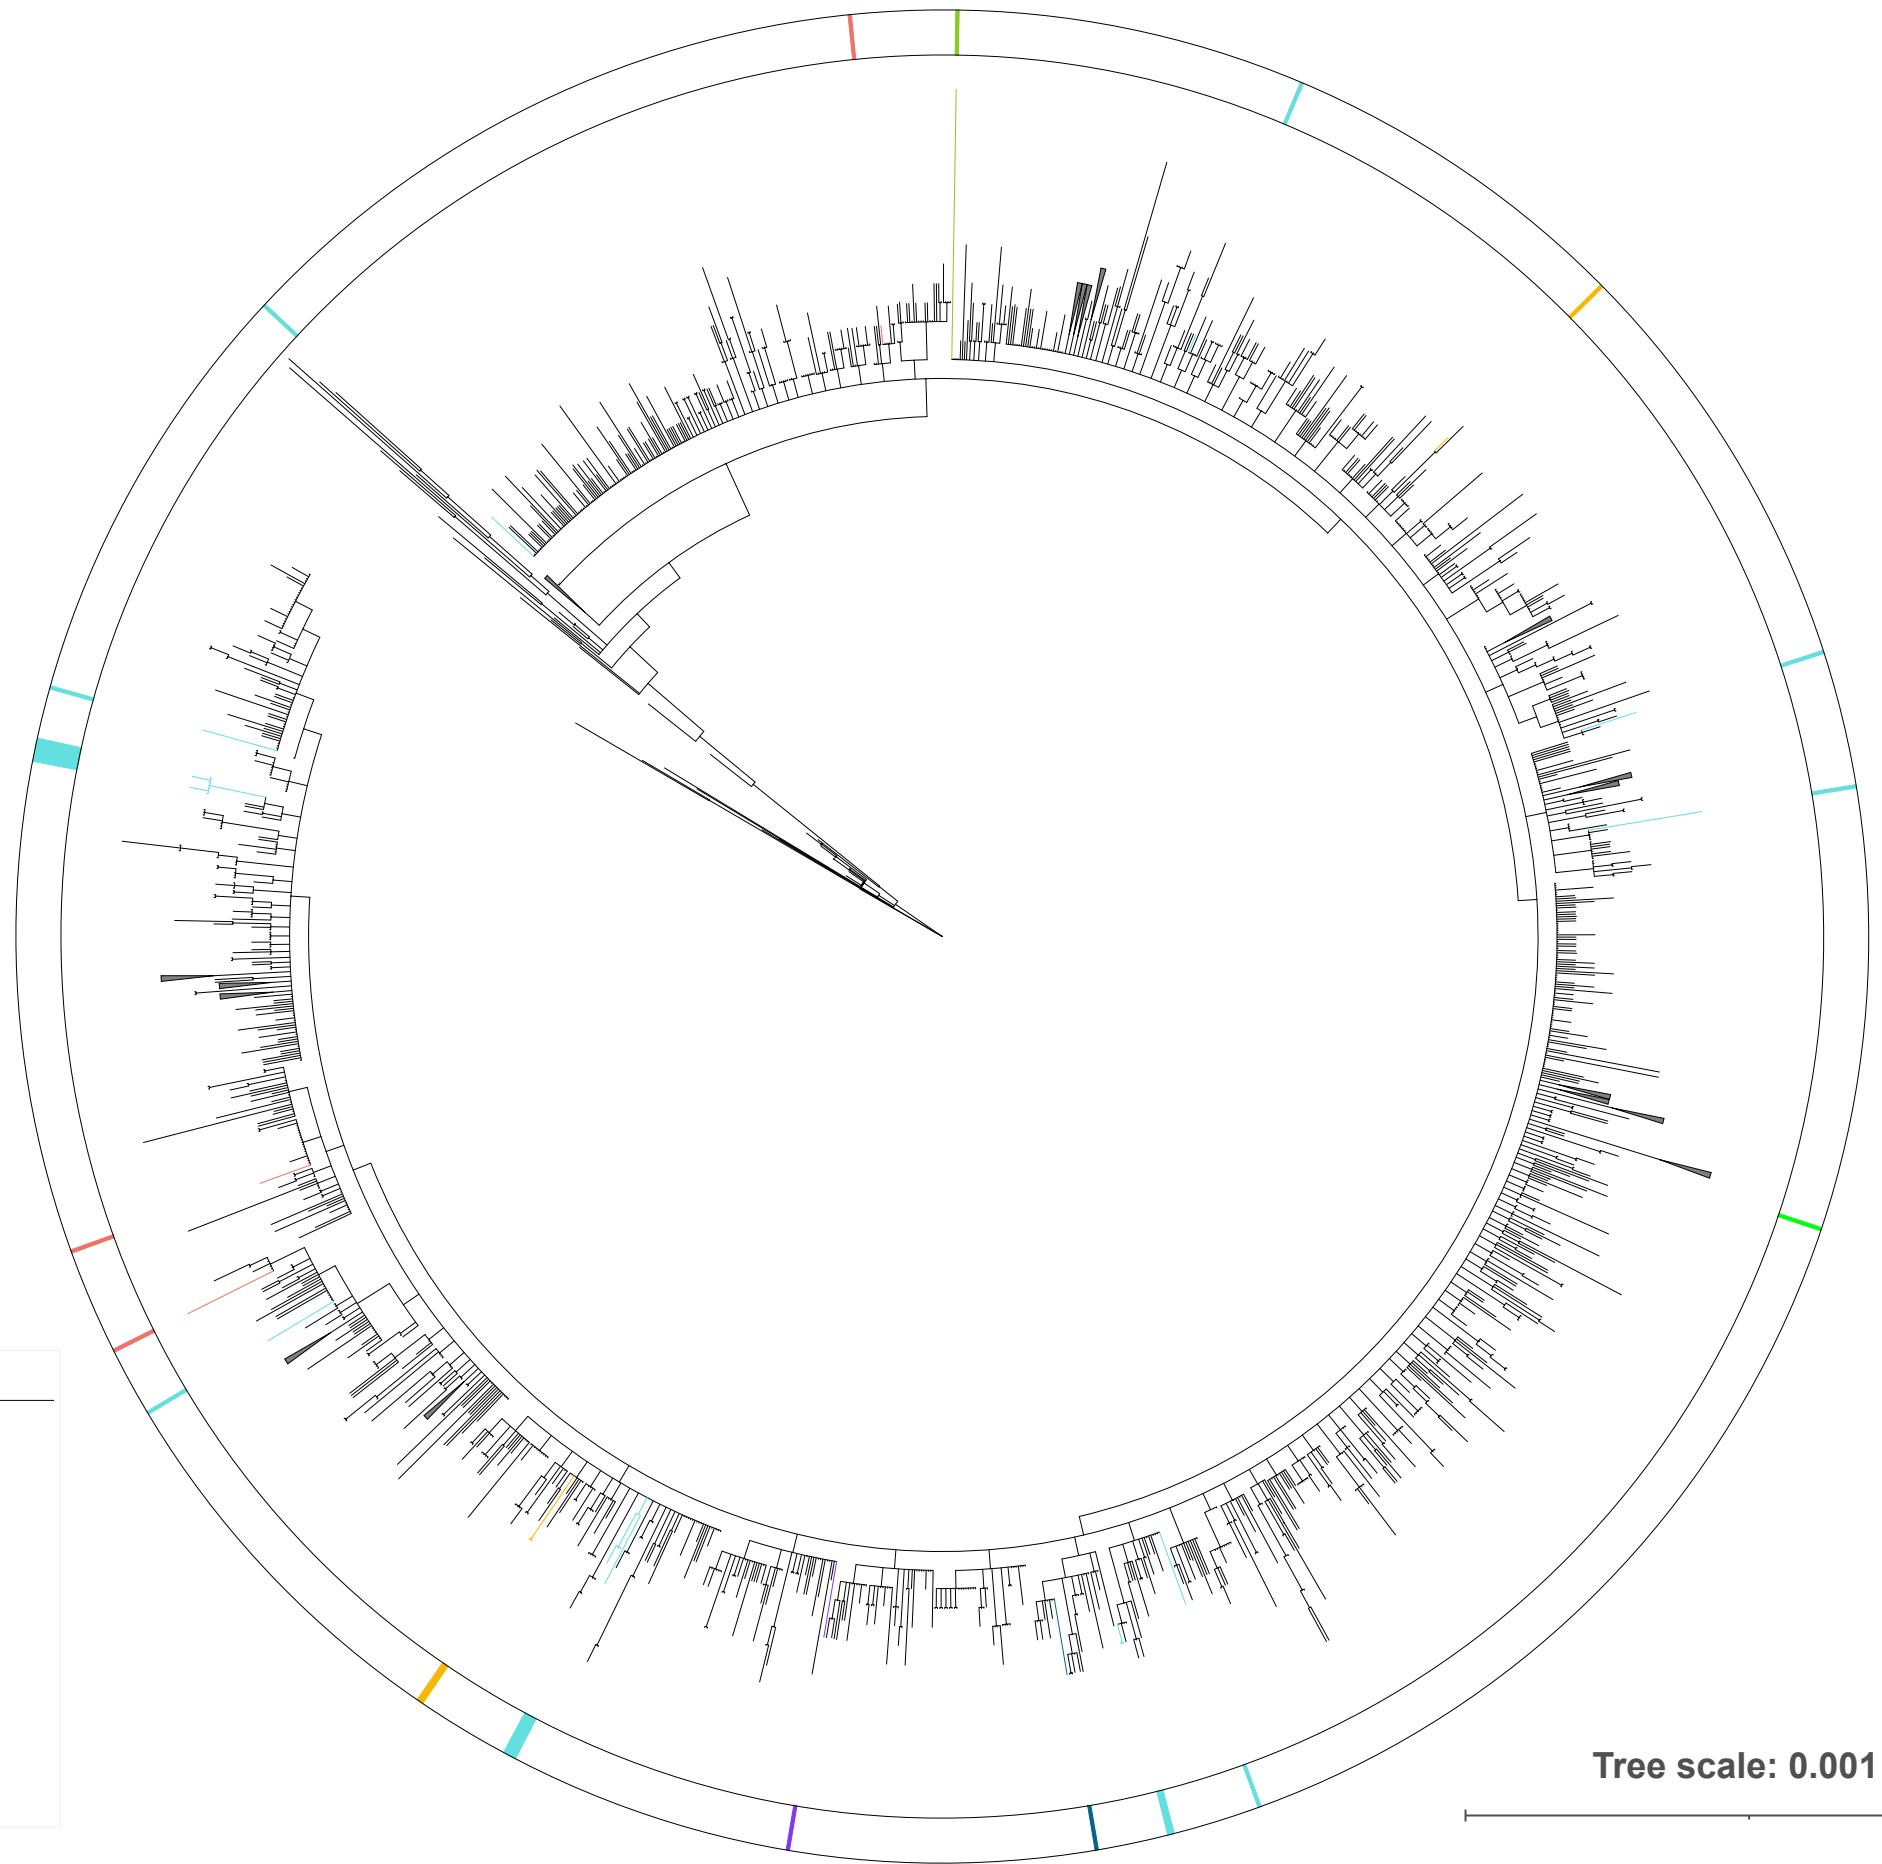

**Sequences involving N501Y**

- D1163A
- D1163N
- D1163V
- D1163Y
- G1167R
- G1167V
- D1163Y and G1167V

Tree scale: 0.001

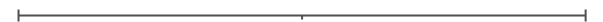

Supplement: mbio.02315-21-sf004.pdf [file mbio.02315-21-sf004.pdf]
