# Supplementary material for: Evolutionary and Phenotypic Characterization of Two Spike Mutations in European Lineage 20E of SARS-CoV-2
Source: PubMed Central journal article supplement (PMC8593680; doi:10.1128/mbio.02315-21), 2021-11-16

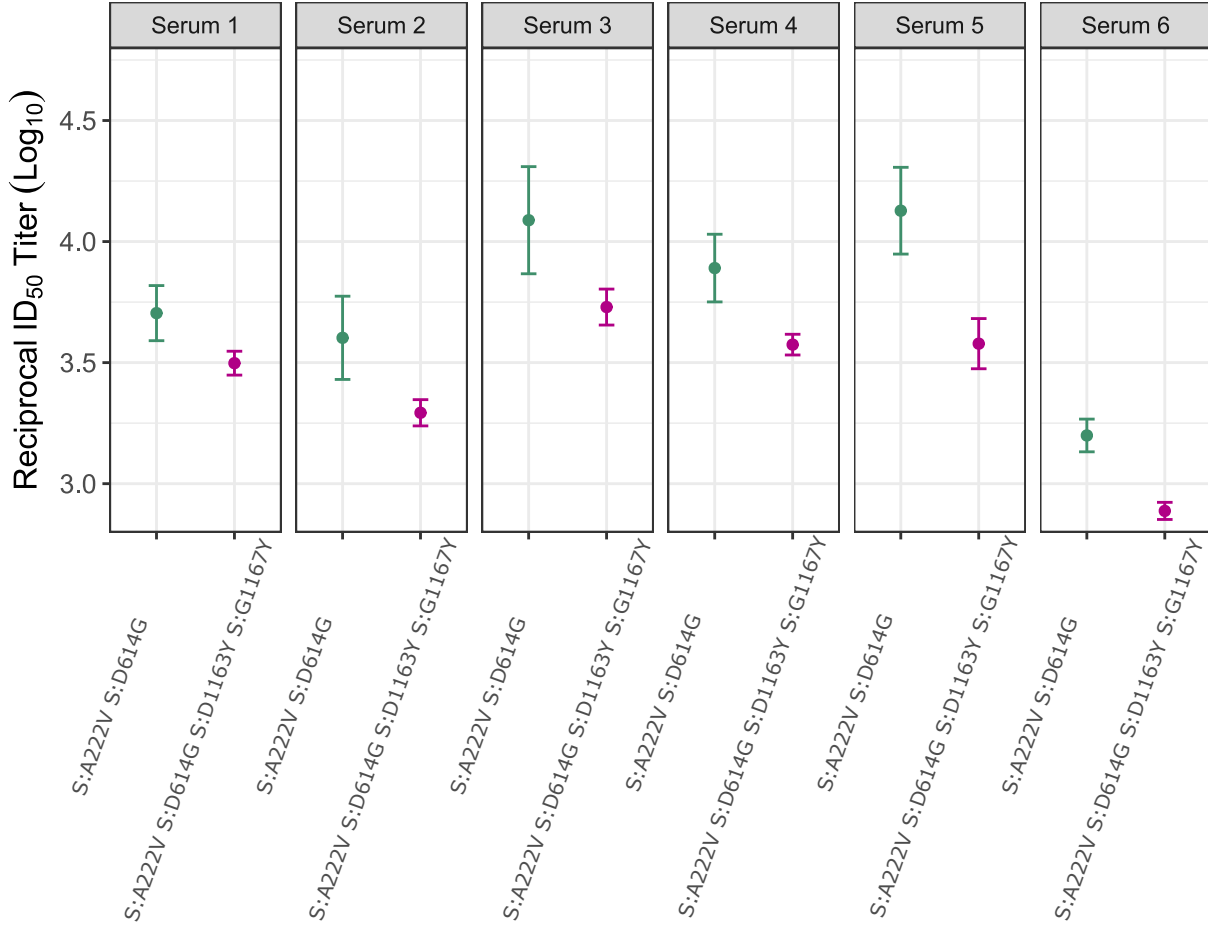

Supplement: mbio.02315-21-sf006.pdf [file mbio.02315-21-sf006.pdf]
